# Supplementary material for: The effect of diethylamine on Stille alkylations with tetraalkylstannanes
Source: Royal Society of Chemistry journal article supplement (doi:10.1039/b103072h), 2001-01-01
Supplement: b103072h.doc [file b103072h.doc]

**Supporting Information**

**Table S1** Stille coupling of -iodoenone **5** with Et4Sn.

**General procedure for the Stille alkylation of -iodoenone with added diethylamine:** To enone **5** (1 mmol) in THF (3 mL), in a sealed tube, was added the ligand (0.2 mmol), Pd catalyst (0.1 mmol), and diethylamine (3 mmol). After stirring for 10 min, the stannane (3 mmol) was added to the previous mixture. The reaction was stirred and heated at 100 °C for the time indicated in the tables. After cooling, 10% Na2SO3 aqueous solution was added. The mixture was extracted with Et2O (3 x 10 mL), the organic phase was washed with 10% KF aqueous solution, dried (MgSO4) and the solvent removed. The residue was purified by chromatography to yield the expected product as indicated in the tables.

Stille coupling of -iodoenone **5** with Me4Sn under several conditions.*a*

| **Pd catalyst** | **Ligand** | **CuI** | **Et2NH** | **Prod** | **Time** | **Yield** |
| --- | --- | --- | --- | --- | --- | --- |
| Pd2(dba)3.CHCl3 | AsPh3 | Yes | No | **8** | 36h | 79% |
| Pd2(dba)3.CHCl3 | AsPh3 | Yes | Yes | **8** | 24h | 99% |
| Pd2(dba)3.CHCl3 | AsPh3 | No | No | **8** | 40h | 80% |
| Pd2(dba)3.CHCl3 | AsPh3 | No | Yes | **8** | 24h | 89% |
| Pd2(dba)3.CHCl3 | PPh3 | Yes | No | **8** | 48h | 73% |
| Pd2(dba)3.CHCl3 | PPh3 | Yes | Yes | **8** | 48h | 75% |
| Pd2(dba)3.CHCl3 | PPh3 | No | No | **5** | 48h | 73% |
| Pd2(dba)3.CHCl3 | PPh3 | No | Yes | **8+5***b* | 48h | 89% |
| Pd(P(*o*-tol)3)2Cl2 | P(*o*-tol)3 | No | Yes | **8** | 24h | 99% |
| Pd(P(*o*-tol)3)2Cl2 | P(*o*-tol)3 | No | No | **8** | 40h | 82% |

*a* The solvent employed was THF. *b*1:5
